# Supplementary material for: Light-induced structural changes during early photo-intermediates of the eubacterial Cl−pump Fulvimarina rhodopsin observed by FTIR difference spectroscopy
Source: Royal Society of Chemistry journal article supplement (doi:10.1039/c5ra19363j), 2015-12-17
Supplement: c5ra19363j1.pdf [file c5ra19363j1.pdf]

*Electronic Supporting Information*

**Light-Induced Structural Changes during Early Photo-Intermediates of the Eubacterial Cl<sup>-</sup> Pump *Fulvimarina* Rhodopsin Observed by FTIR Difference Spectroscopy**

Faisal Hammad Mekky Koua,<sup>\*ab</sup> and Hideki Kandori<sup>\*ac</sup>

<sup>a</sup>*OptoBioTechnology Research Center, Nagoya Institute of Technology, Showa-ku, Nagoya 466-8555, Japan.* <sup>b</sup>*Present address: Center for Membrane Biology, Department of Molecular Physiology and Biological Physics, University of Virginia, Charlottesville, Virginia 22908 U.S.A.*

<sup>c</sup>*Department of Frontier Materials, Nagoya Institute of Technology, Showa-ku, Nagoya 466-8555, Japan.*

\*Corresponding author(s):

fk3p@virginia.edu (F.H.M.K.)

kandori@nitech.ac.jp (H.K.)

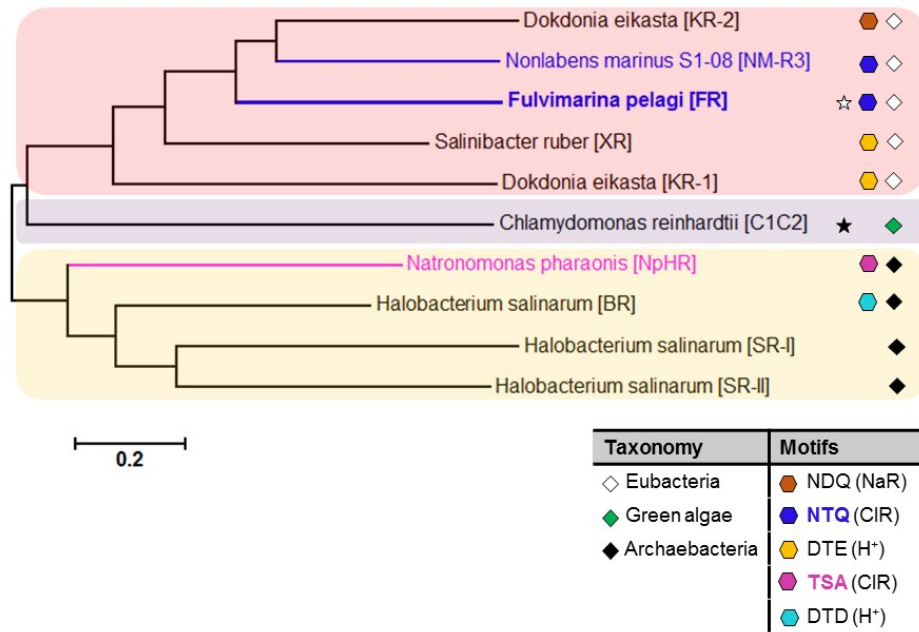

**Fig. S1.** Phylogenetic analysis of FR against different types of microbial rhodopsins namely, bacteriorhodopsin (BR), halorhodopsin (NpHR), xanthorhodopsin (XR), Sodium ion pump (KR2), Chloride ion pump (NM-R3 and FR), sensory rhodopsins (SR-I and SR-II), and chimeric channel rhodopsin (C1C2).

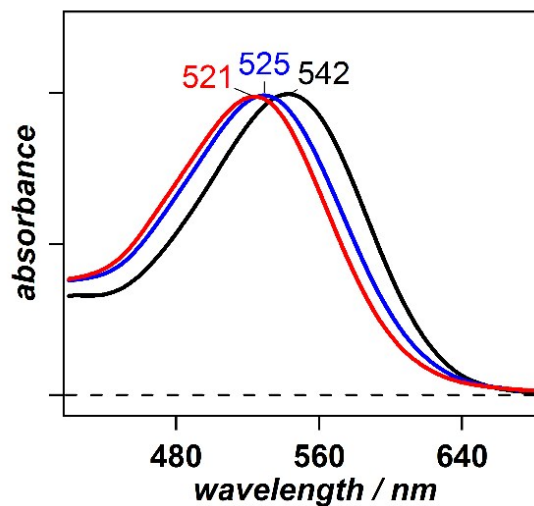

**Fig. S2.** UV-vis absorption spectra of  $\beta$ -DDM solubilized FR solution recorded at ambient temperature using a UV-vis spectrophotometer connected with integrating sphere for salt-free (black-line), 250 mM NaCl (blue-line) and 600 mM NaCl (red-line) containing-buffers, which clearly indicate the salt-dependency (blueshift) of FR as we reported previously.<sup>1</sup>

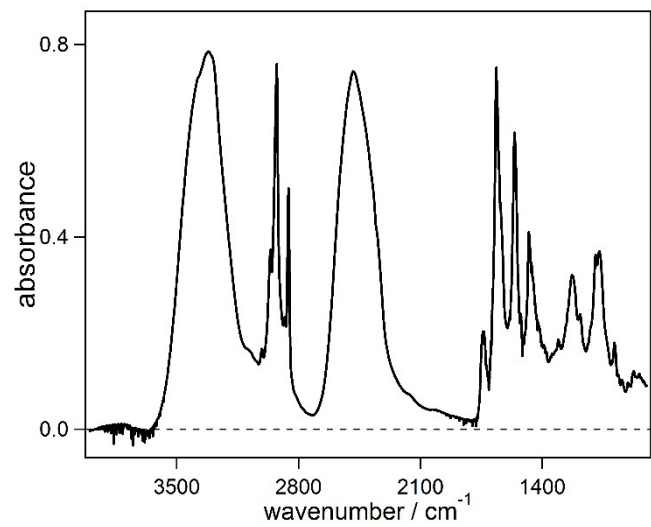

**Fig. S3.** A typical IR absorption spectrum of deuterium oxide hydrated film measured at 77 K of FR-liposomes. The FR-films are normally deuterated with  $\sim 1.5 \mu\text{l}$   $\text{D}_2\text{O}$  divided into two drops and quickly assembled before mounting into a cryostat holder connected with the FTIR spectrometer.

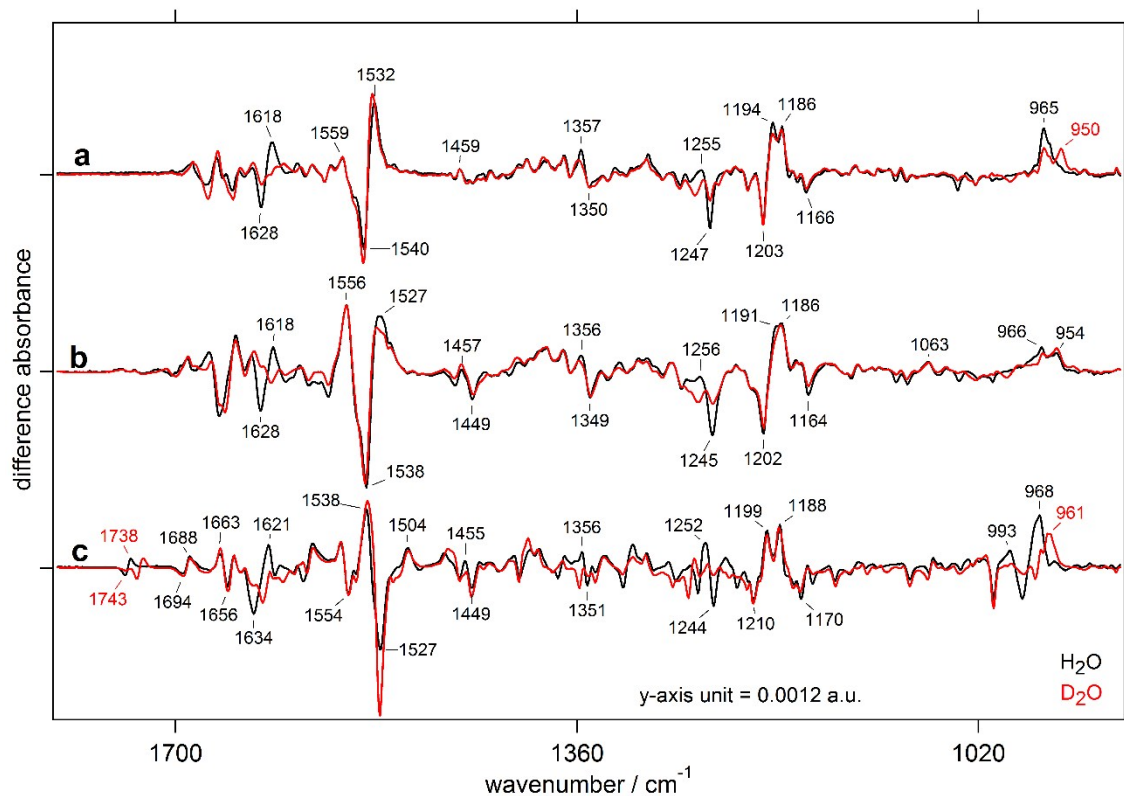

**Fig. S4.** Typical light-induced difference FTIR spectra of FR<sub>K</sub>-minus-FR recorded at 77K (a), FR<sub>L</sub>-minus-FR recorded at 220 K (b), and the archaeal halorhodopsin NpHR spectra of pHR<sub>K</sub>-minus-pHR recorded at 77 K (c). Spectra at 220 K in (b) were normalized to the spectrum at 1186 cm<sup>-1</sup> of the 77 K FTIR spectra and multiplied by a factor of 2.1 for H<sub>2</sub>O and 1.4 for D<sub>2</sub>O spectra.

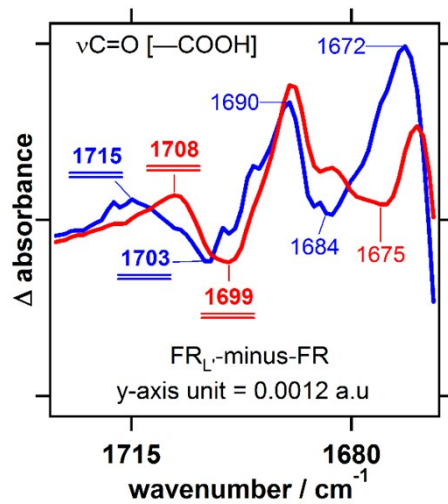

**Fig. S5.** Protonated carboxylic group (C=O stretching vibrations) at the 1728–1668  $\text{cm}^{-1}$  frequency of likely an Asp residue(s) trapped at 220 K as a new component implying a re-protonation of a carboxylate residue nearby the retinal chromophore.
